# Supplementary material for: Azobenzene-derived tris-β-diketonate lanthanide complexes: reversible trans-to-cis photoisomerization in solution and solid state
Source: Royal Society of Chemistry journal article supplement (doi:10.1039/c6dt01310d), 2016-01-01
Supplement: c6dt01310d1.pdf [file c6dt01310d1.pdf]

## Azobenzene-Derived *tris*- $\beta$ -Diketonates Lanthanide Complexes: Reversible *trans*-to-*cis* Photoisomerization in Solution and Solid State

Li-Rong Lin,<sup>\*,†</sup> Xuan Wang,<sup>†</sup> Gao-Ning Wei,<sup>†</sup> Hui-Hui Tang,<sup>†</sup> Hui Zhang,<sup>†</sup> Li-Hua Ma<sup>\*,‡</sup>

<sup>†</sup> *Department of Chemistry, College of Chemistry and Chemical Engineering, Xiamen University, Xiamen, 361005, P. R. China*

<sup>‡</sup> *Department of Chemistry, School of Science and Computer Engineer, University of Houston at Clear Lake, 2700 BAY AREA BLVD, Houston, TX, 77058*

1. Crystal structures for Figures S1–S2.....Page 1
2. UV–Vis absorption spectra for Figures S3–S5.....Page 2
3. UV–Vis absorption spectral change for Figures S6–S22.....Page 3-12
4. The *trans*-*cis* photoisomerization kinetics curves Figures S23–33...Page 13-15
5. <sup>1</sup>H NMR spectra of compounds Figures S34–43.....Page 16-19
6. IR spectra of compounds Figures S44– S53.....Page 20-23

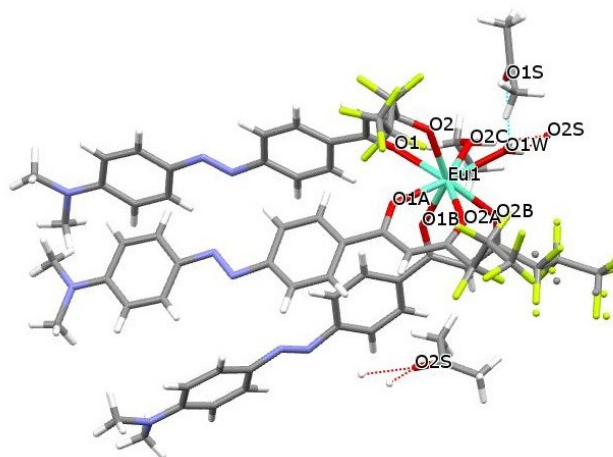

Figure S1. Crystal structure of  $\text{Eu}(\text{LB})_3(\text{CH}_3\text{CH}_2\text{OH})(\text{H}_2\text{O})$ . Selected bonds distances ( $\text{\AA}$ ) and angles ( $^\circ$ ) :  $\text{Eu1-O1B}$  2.315(4),  $\text{Eu1-O2A}$  2.333(5),  $\text{Eu1-O2}$  2.360(4),  $\text{Eu1-O1A}$  2.364(4),  $\text{Eu1-O1}$  2.369(4),  $\text{Eu1-O2B}$  2.408(4),  $\text{Eu1-O1W}$  2.427(5),  $\text{Eu1-O2C}$  2.462(4);  $\text{O1B-Eu1-O2A}$  95.88(17),  $\text{O1B-Eu1-O2}$  141.63(14),  $\text{O1B-Eu1-O1A}$  73.67(16),  $\text{O2A-Eu1-O1A}$  69.47(14),  $\text{O1B-Eu1-O1W}$  142.86(18),  $\text{O2A-Eu1-O1W}$  82.10(18),  $\text{O2-Eu1-O1W}$  74.99(16),  $\text{O1B-Eu1-O2C}$  91.02(17).

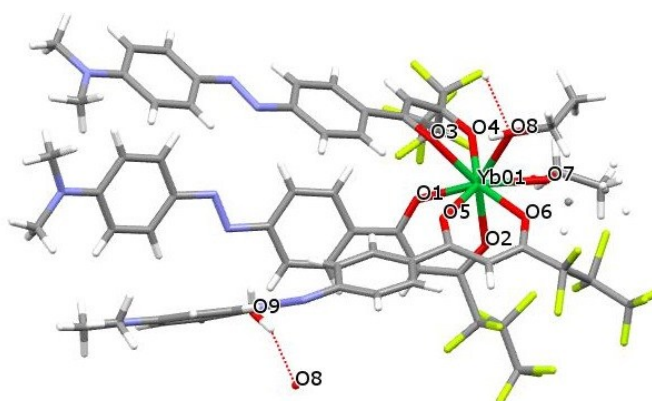

Figure S2. Crystal structure of  $\text{Yb}(\text{LB})_3(\text{CH}_3\text{CH}_2\text{OH})_2$ . Selected bonds distances ( $\text{\AA}$ ) and angles ( $^\circ$ ) :  $\text{Yb01-O5}$  2.229(8),  $\text{Yb01-O4}$  2.271(8),  $\text{Yb01-O3}$  2.280(6),  $\text{Yb01-O2}$  2.279(8),  $\text{Yb01-O6}$  2.281(8),  $\text{Yb01-O1}$  2.304(8),  $\text{Yb01-O8}$  2.344(9),  $\text{Yb01-O7}$  2.252(10);  $\text{O1-Yb01-O7}$  135.6(6),  $\text{O2-Yb01-O8}$  145.7(3),  $\text{O3-Yb01-O8}$  69.4(3),  $\text{O4-Yb01-O2}$  108.3(3),  $\text{O5-Yb01-O4}$  142.6(2),  $\text{O6-Yb01-O1}$  136.6(2),  $\text{O3-Yb01-O6}$  125.4(3),  $\text{O5-Yb01-O8}$  102.1(4).

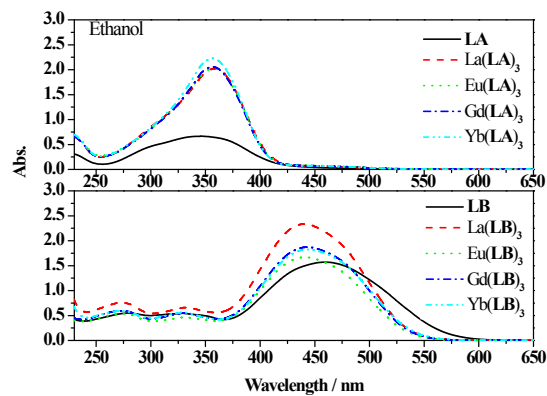

Figure S3. UV-Vis absorption spectra of **LA**, **LA-Ln(III)** and **LB**, **LB-Ln(III)** ( $5.0 \times 10^{-5}$  mol L<sup>-1</sup>) in ethanol solutions.

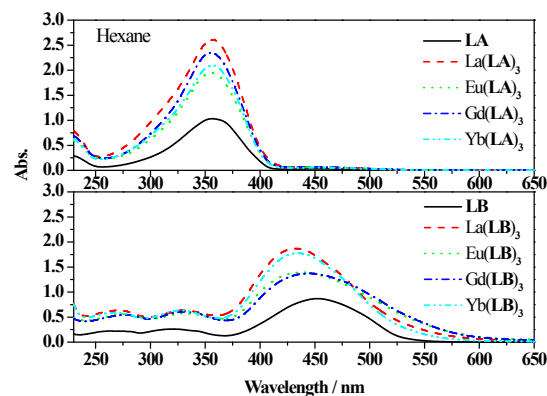

Figure S4. UV-Vis absorption spectra of **LA**, **LA-Ln(III)** and **LB**, **LA-Ln(III)** ( $5.0 \times 10^{-5}$  mol L<sup>-1</sup>) in hexane solutions.

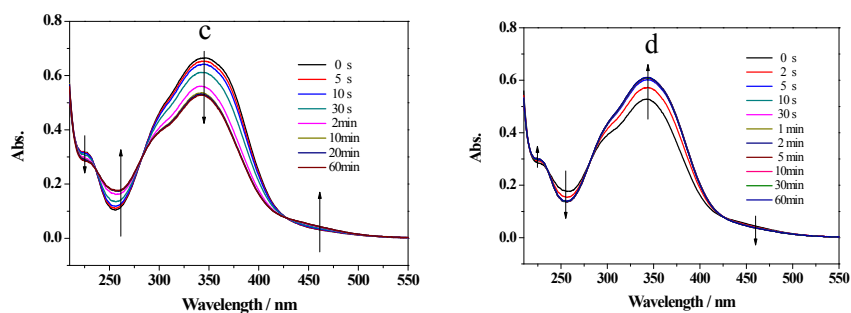

Figure S5. UV-Vis spectral change of **LA** in ethanol ( $2.0 \times 10^{-5}$  mol L<sup>-1</sup>) solution upon irradiation at 365 nm (c) and recoverable irradiation at 450 nm (d) as a function of time.

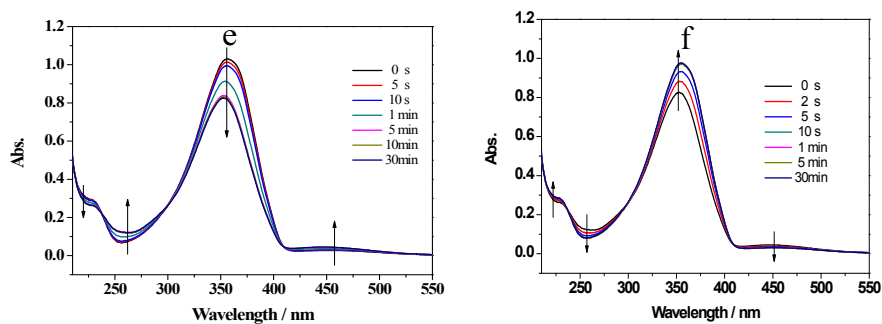

Figure S6. UV-Vis spectral change of **LA** in hexane ( $2.0 \times 10^{-5} \text{ mol L}^{-1}$ ) solution upon irradiation at 365 nm (e) and recoverable irradiation at 450 nm (f) as a function of time.

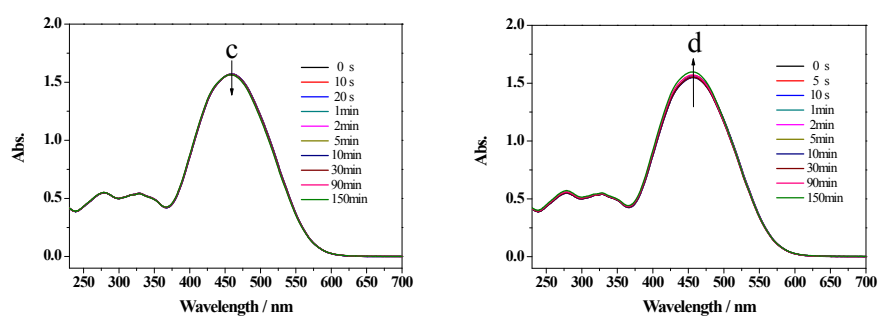

Figure S7. UV-Vis spectral change of **LB** in ethanol ( $2.0 \times 10^{-5} \text{ mol L}^{-1}$ ) solution upon irradiation at 365 nm (c) and recoverable irradiation at 450 nm (d) as a function of time.

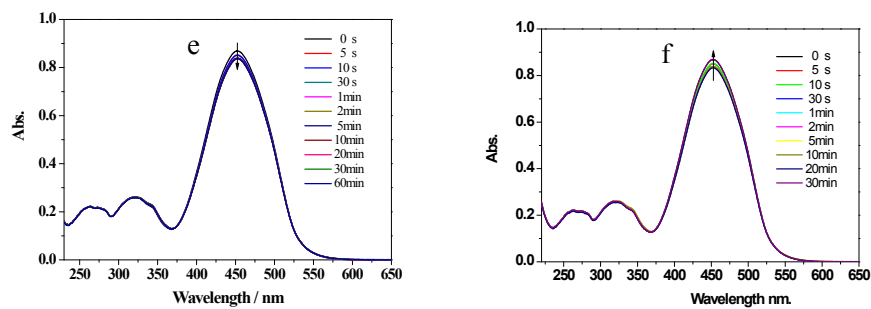

Figure S8. UV-Vis spectral change of **LB** in hexane ( $2.0 \times 10^{-5} \text{ mol L}^{-1}$ ) solution upon irradiation at 365 nm (e) and recoverable irradiation at 450 nm (f) as a function of time.

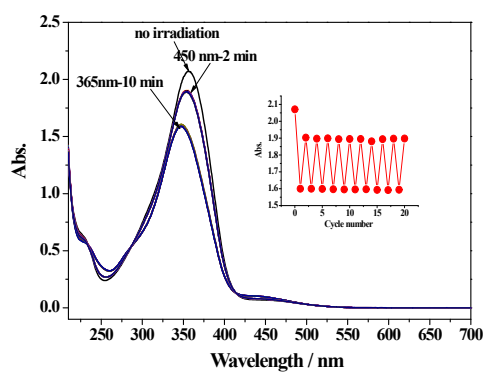

Figure S9. Absorption spectra of  $\text{Yb}(\text{LA})_3$  in acetonitrile solution under no irradiation, and in the photostationary states after alternating irradiation at  $\lambda = 365$  and  $\lambda = 450$  nm in repeating switching cycles (Inset: reversible change of absorption intensity at 358 nm).

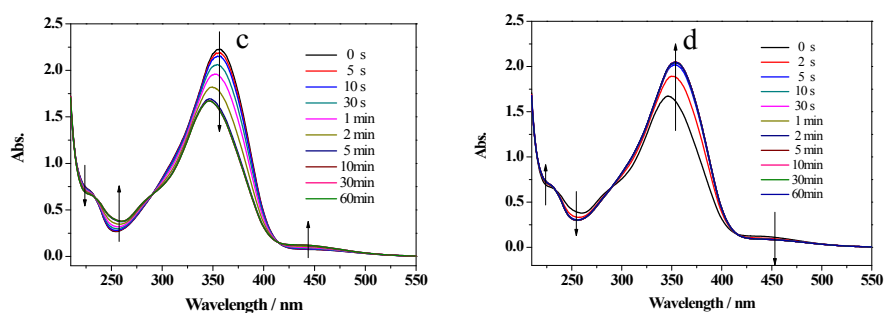

Figure S10. UV-Vis spectral change of  $\text{Yb}(\text{LA})_3$  in ethanol ( $2.0 \times 10^{-5} \text{ mol L}^{-1}$ ) solution upon irradiation at 365 nm (c) and recoverable irradiation at 450 nm (d) as a function of time.

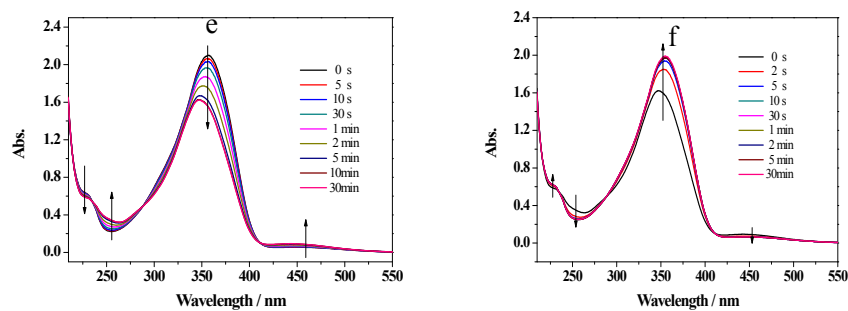

Figure S11. UV-Vis spectral change of  $\text{Yb}(\text{LA})_3$  in hexane ( $2.0 \times 10^{-5} \text{ mol L}^{-1}$ ) solution upon irradiation at 365 nm (e) and recoverable irradiation at 450 nm (f) as a function of time.

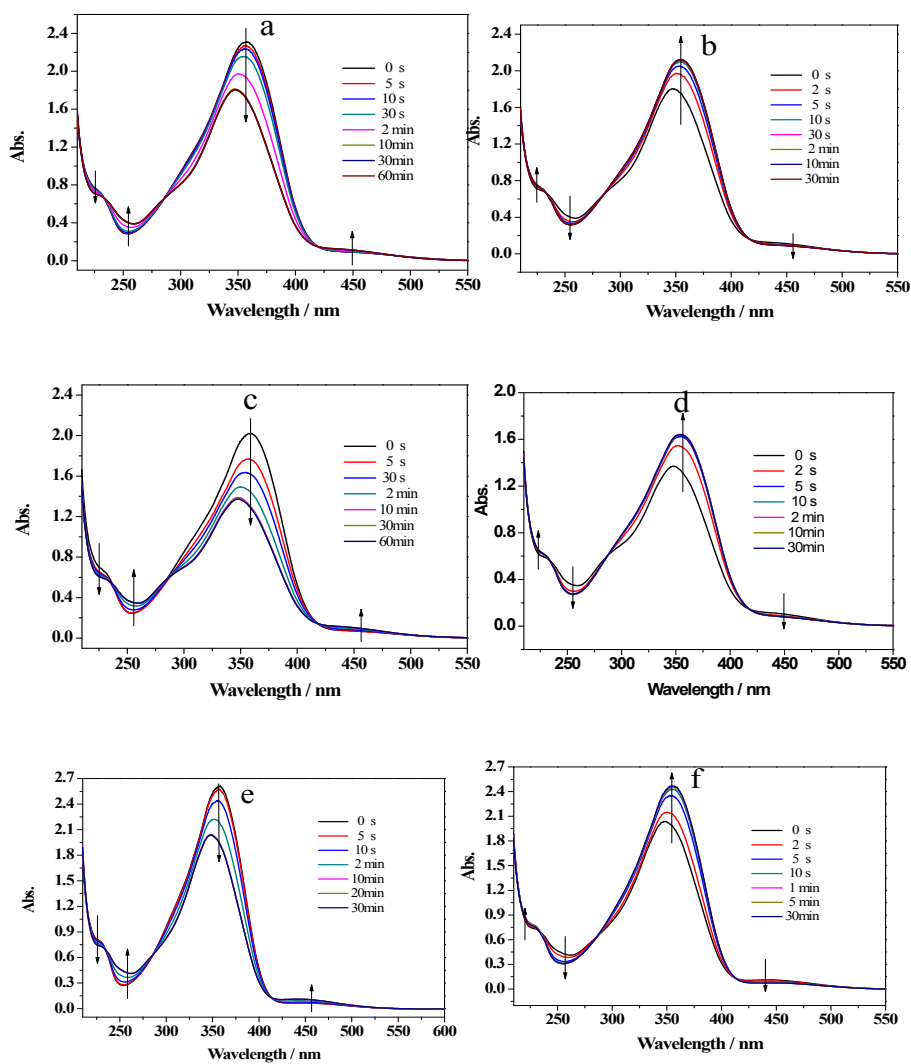

Figure S12. UV-Vis spectral change of  $\text{La}(\text{LA})_3$  in acetonitrile(a, b), ethanol (c, d) and hexane (e, f) ( $2.0 \times 10^{-5} \text{ mol L}^{-1}$ ) solutions upon irradiation at 365 nm (a, c, e) and recoverable irradiation at 450 nm (b, d, f) as a function of time.

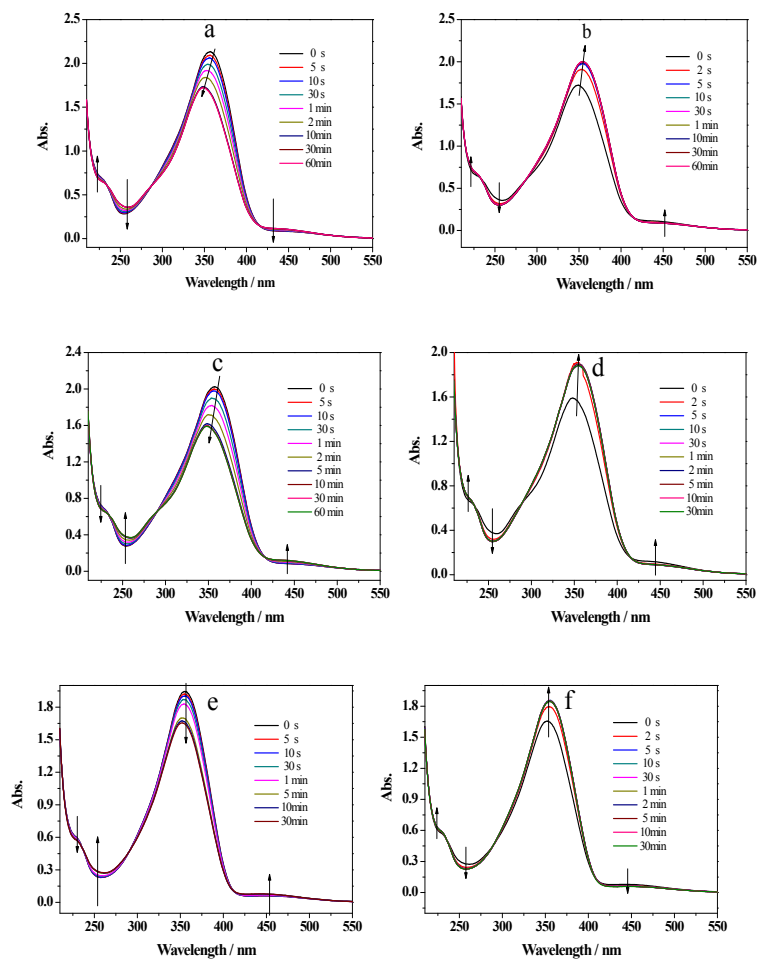

Figure S13. UV-Vis spectral change of  $\text{Eu}(\text{LA})_3$  in acetonitrile(a, b), ethanol (c, d) and hexane (e, f) ( $2.0 \times 10^{-5} \text{ mol L}^{-1}$ ) solutions upon irradiation at 365 nm (a, c, e) and recoverable irradiation at 450 nm (b, d, f) as a function of time.

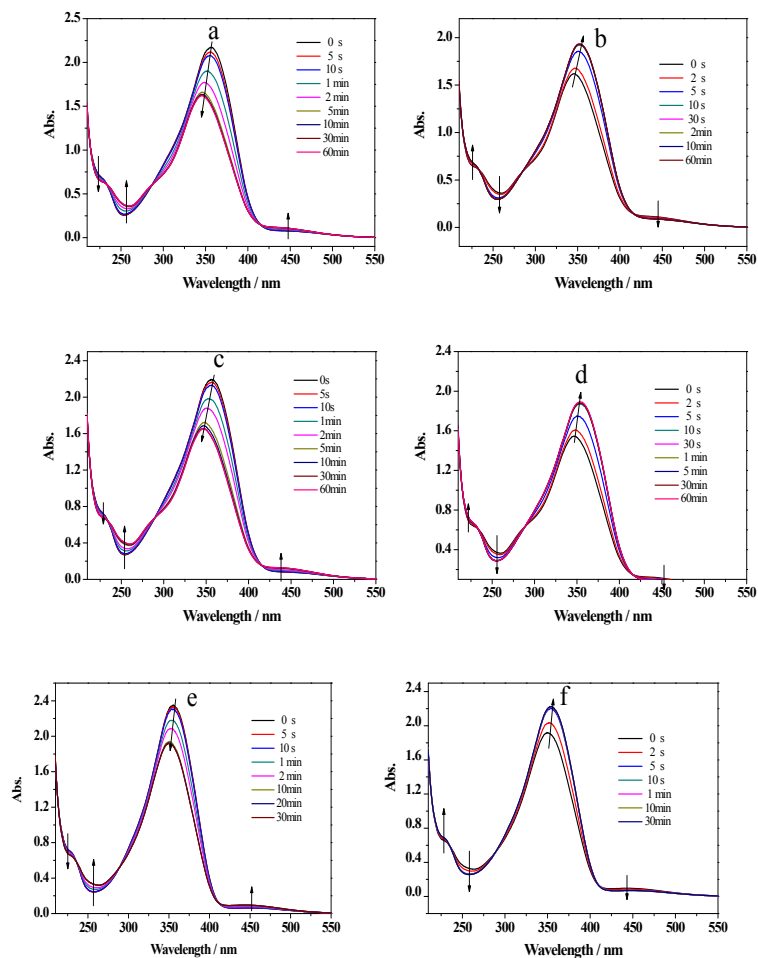

Figure S14. UV-Vis spectral change of  $Gd(LA)_3$  in acetonitrile(a, b), ethanol (c, d) and hexane (e, f) ( $2.0 \times 10^{-5} \text{ mol L}^{-1}$ ) solutions upon irradiation at 365 nm (a, c, e) and recoverable irradiation at 450 nm (b, d, f) as a function of time.

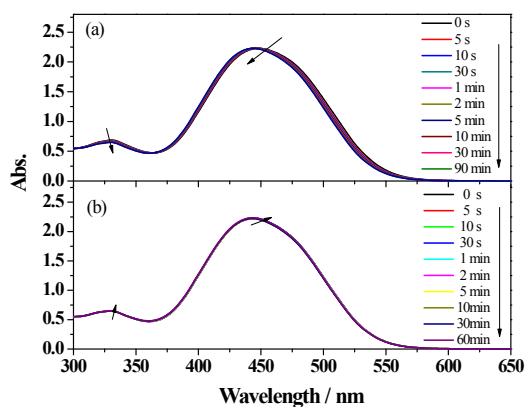

Figure S15. UV-Vis spectral change of  $Yb(LB)_3$  in acetonitrile ( $2.0 \times 10^{-5} \text{ mol L}^{-1}$ ) upon irradiation at 365 nm (a) and recoverable irradiation at 450 nm (b) as a function of time.



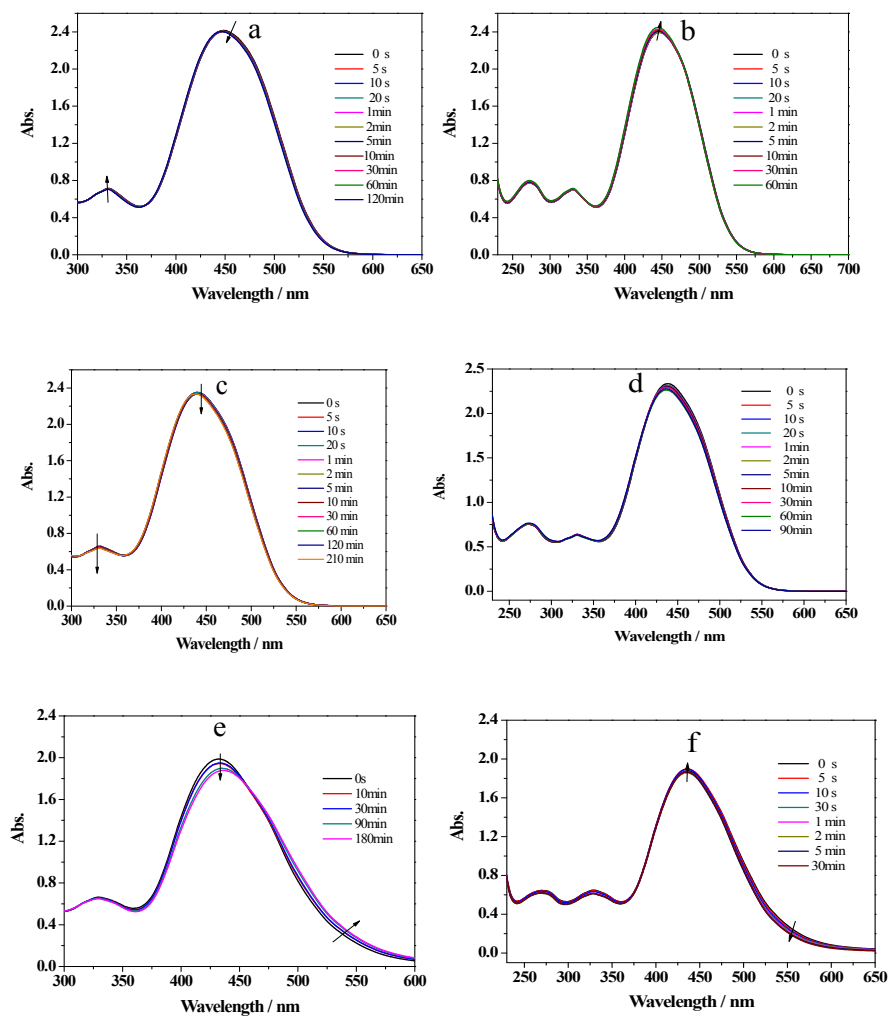

Figure S16. UV-Vis spectral change of  $\text{La}(\text{LB})_3$  in acetonitrile (a, b), ethanol (c, d) and hexane (e, f) ( $2.0 \times 10^{-5} \text{ mol L}^{-1}$ ) solutions upon irradiation at 365 nm (a, c, e) and recoverable irradiation at 450 nm (b, d, f) as a function of time.

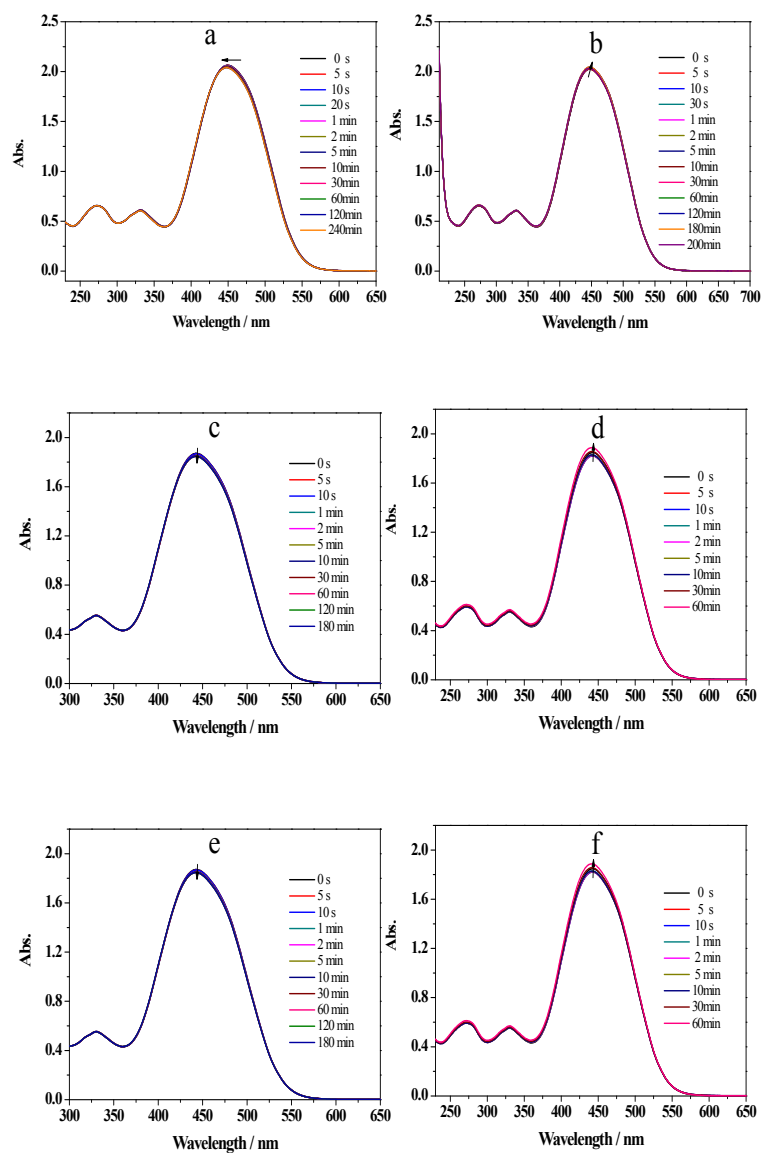

Figure S17. UV-Vis spectral change of  $\text{Eu}(\text{LB})_3$  in acetonitrile (a, b), ethanol (c, d) and hexane (e, f) ( $2.0 \times 10^{-5} \text{ mol L}^{-1}$ ) solutions upon irradiation at 365 nm (a, c, e) and recoverable irradiation at 450 nm (b, d, f) as a function of time.

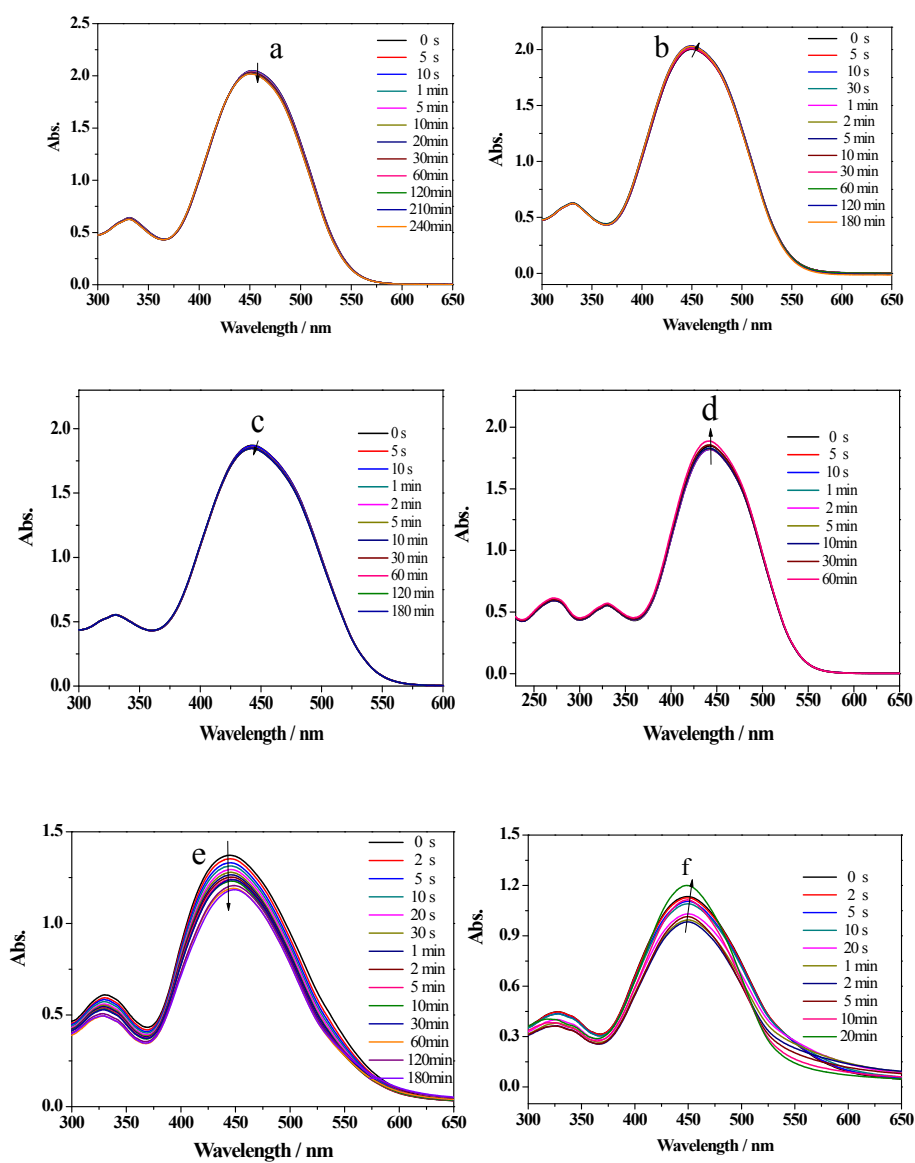

Figure S18. UV-Vis spectral change of  $Gd(LB)_3$  in acetonitrile (a, b), ethanol (c, d) and hexane (e, f) ( $2.0 \times 10^{-5} \text{ mol L}^{-1}$ ) solutions upon irradiation at 365 nm (a, c, e) and recoverable irradiation at 450 nm (b, d, f) as a function of time.

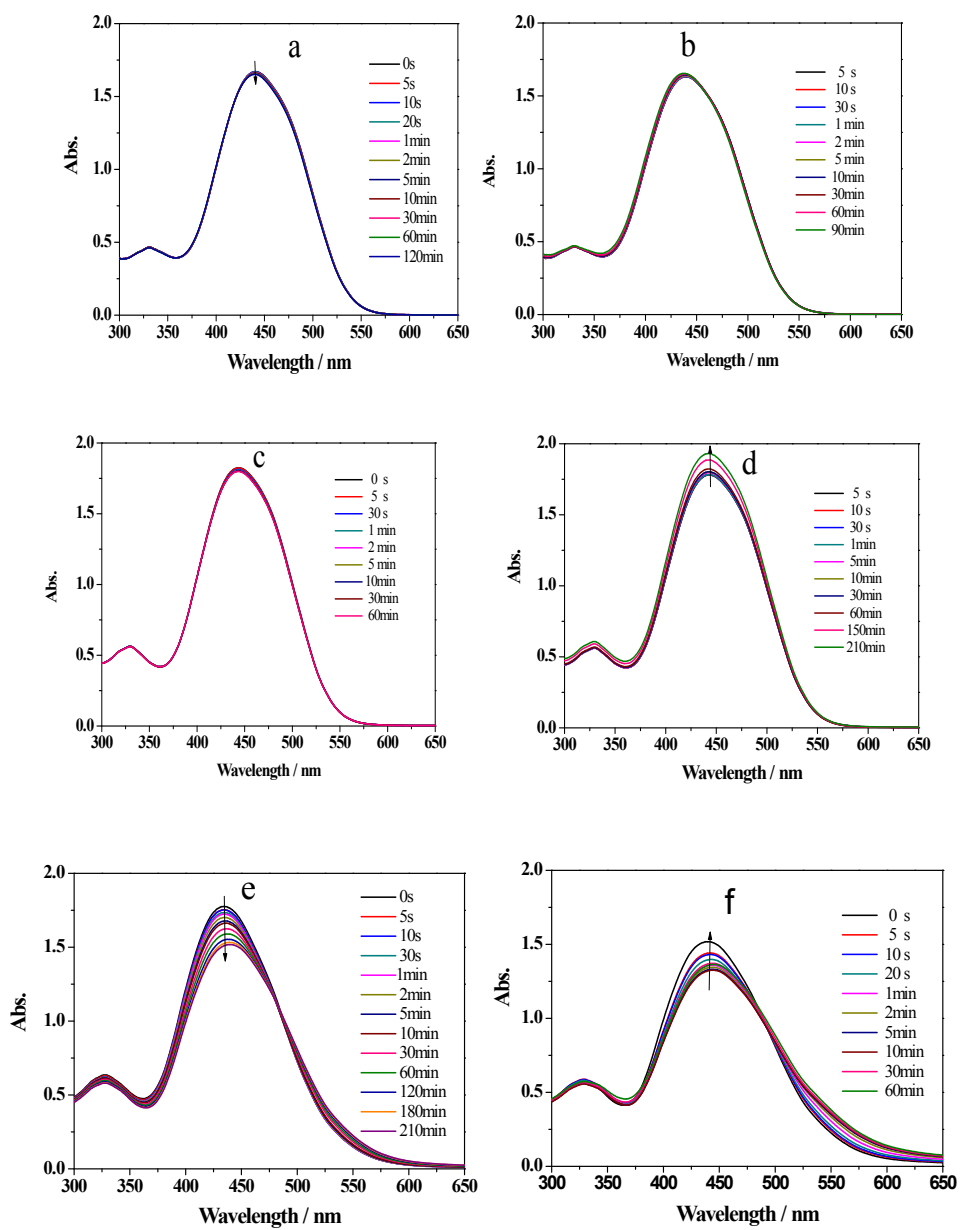

Figure S19. UV-Vis spectral change of  $\text{Yb}(\text{LB})_3$  in acetonitrile (a, b), ethanol (c, d) and hexane (e, f) ( $2.0 \times 10^{-5} \text{ mol L}^{-1}$ ) solutions upon irradiation at 365 nm (a, c, e) and recoverable irradiation at 450 nm (b, d, f) as a function of time.

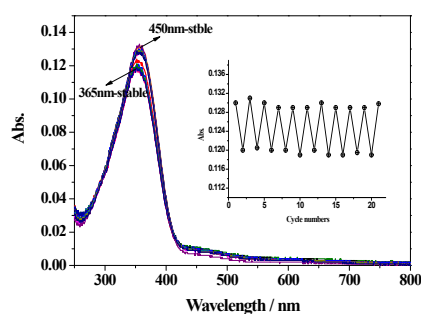

Figure S20. UV–Vis spectral change of La(LA)<sub>3</sub> in PMMA film (5.0wt%) upon irradiation at 365 nm and recoverable irradiation at 450 nm (Inset: reversible change of absorption intensity at 358 nm in the photostationary states after alternating irradiation at  $\lambda = 365$  and  $\lambda = 450$  nm in repeated switching cycles).

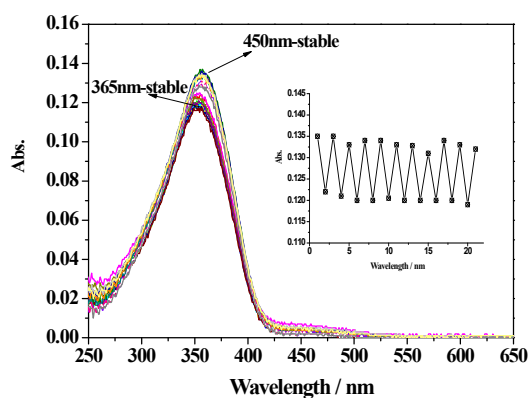

Figure S21. UV–Vis spectral change of Eu(LA)<sub>3</sub> in PMMA film (5.0wt%) upon irradiation at 365 nm (a) and recoverable irradiation at 450 nm (b) (Inset: reversible change of absorption intensity at 358 nm in the photostationary states after alternating irradiation at  $\lambda = 365$  and  $\lambda = 450$  nm in repeated switching cycles).

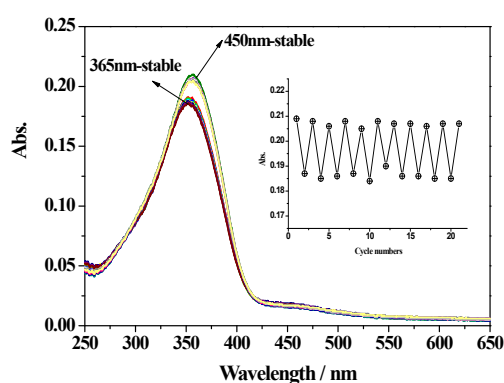

Figure S22. UV–Vis spectral change of Gd(LA)<sub>3</sub> in PMMA film (5.0wt%) upon irradiation at 365 nm (a) and recoverable irradiation at 450 nm (b) (Inset: reversible change of absorption intensity at 358 nm in the photostationary states after alternating irradiation at  $\lambda = 365$  and  $\lambda = 450$  nm in repeated switching cycles).

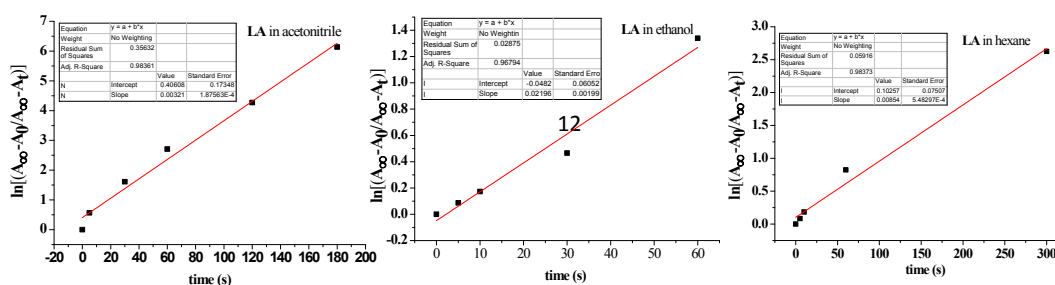

Figure S23. The *trans-cis* photoisomerization kinetics of  $\ln(A_{\infty}-A_0)/(A_{\infty}-A_t)$  as a function of time for **LA** in different solvents.

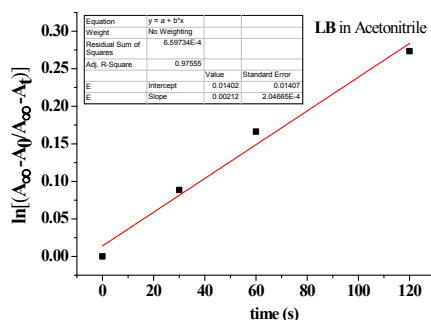

Figure S24. The *trans-cis* photoisomerization kinetics of  $\ln(A_{\infty}-A_0)/(A_{\infty}-A_t)$  as a function of time for **LB** in acetonitrile.

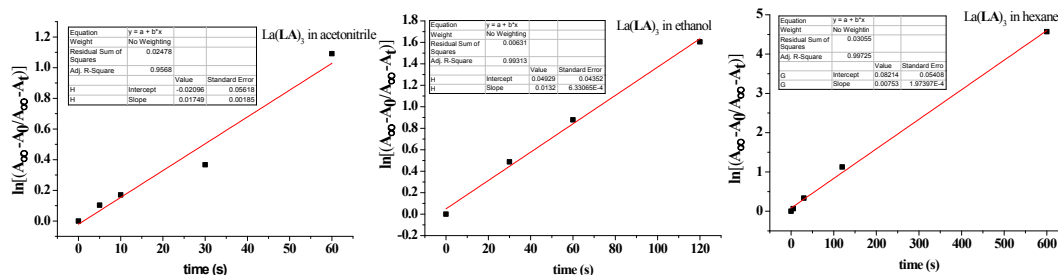

Figure S25. The *trans-cis* photoisomerization kinetics of  $\ln(A_{\infty}-A_0)/(A_{\infty}-A_t)$  as a function of time for **La(LA)<sub>3</sub>** in different solvents.

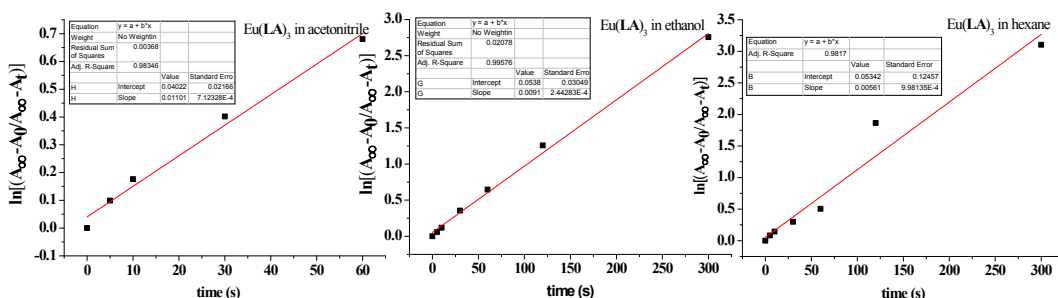

Figure S26. The *trans-cis* photoisomerization kinetics of  $\ln(A_{\infty}-A_0)/(A_{\infty}-A_t)$  as a function of time for **Eu(LA)<sub>3</sub>** in different solvents.

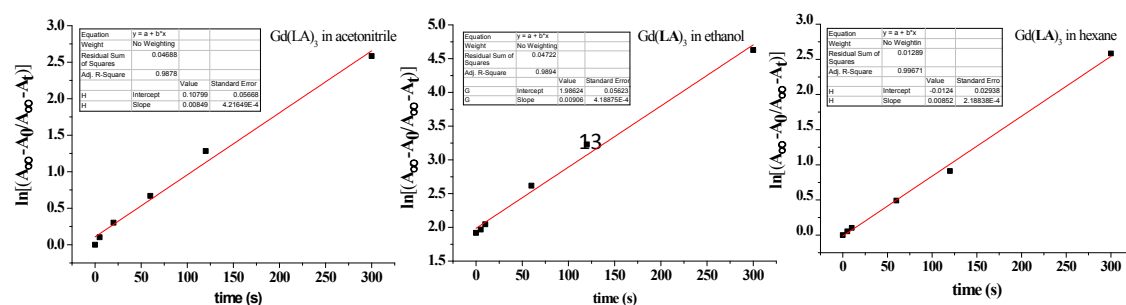

Figure S27. The *trans-cis* photoisomerization kinetics of  $\ln(A_\infty - A_0)/(A_\infty - A_t)$  as a function of time for Gd(LA)<sub>3</sub> in different solvents.

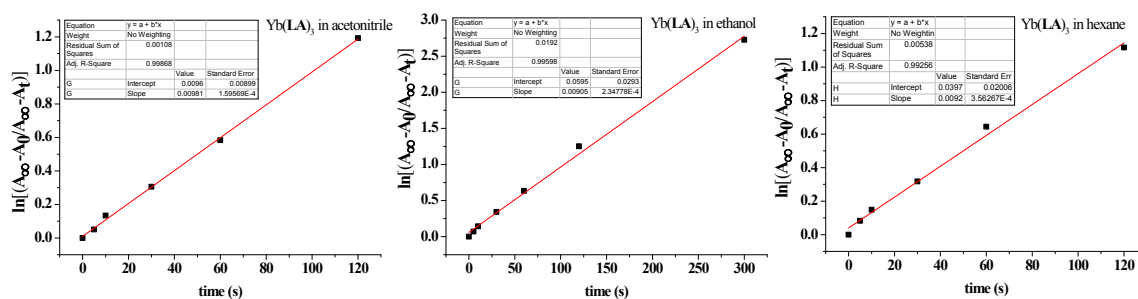

Figure S28. The *trans-cis* photoisomerization kinetics of  $\ln(A_\infty - A_0)/(A_\infty - A_t)$  as a function of time for Yb(LA)<sub>3</sub> in different solvents.

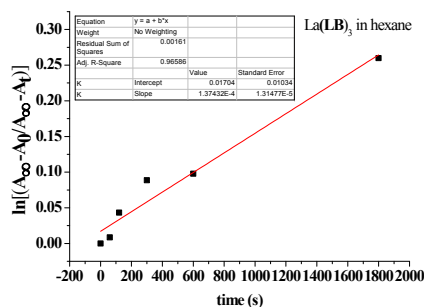

Figure S29. The *trans-cis* photoisomerization kinetics of  $\ln(A_\infty - A_0)/(A_\infty - A_t)$  as a function of time for La(LB)<sub>3</sub> in hexane solution.

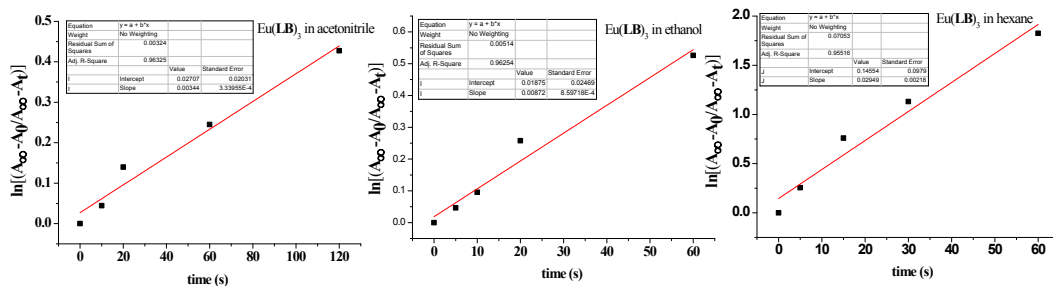

Figure S30. The *trans-cis* photoisomerization kinetics of  $\ln(A_\infty - A_0)/(A_\infty - A_t)$  as a function of time for Gd(LB)<sub>3</sub> in different solvents.

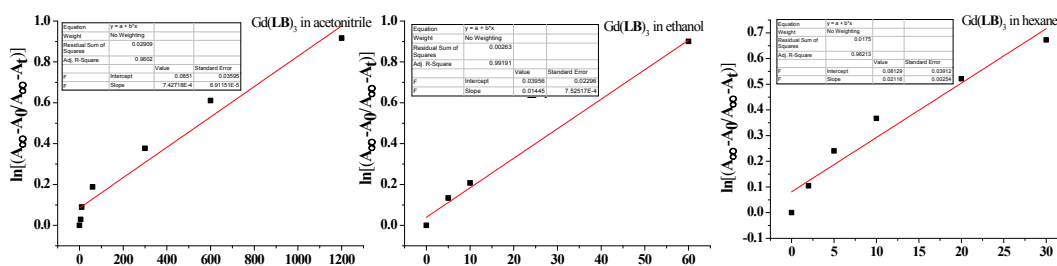

Figure S31. The *trans-cis* photoisomerization kinetics of  $\ln(A_\infty - A_0)/(A_\infty - A_t)$  as a function of time for Gd(LB)<sub>3</sub> in different solvents.

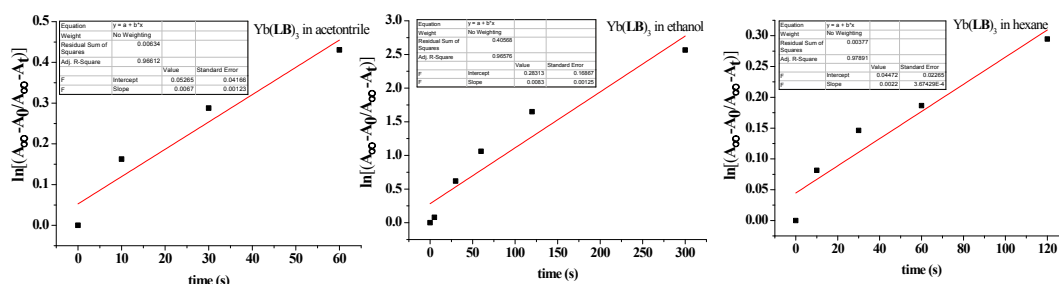

Figure S32. The *trans-cis* photoisomerization kinetics of  $\ln(A_\infty - A_0)/(A_\infty - A_t)$  as a function of time for Yb(LB)<sub>3</sub> in different solvents.

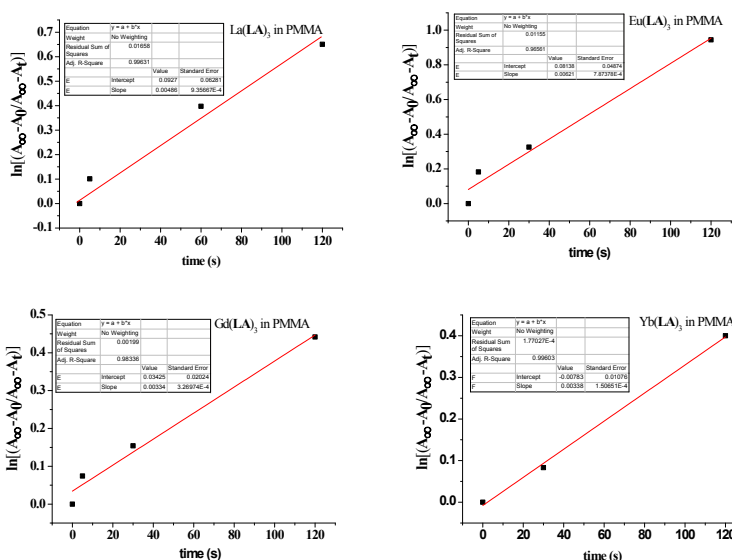

Figure S33. The *trans-cis* photoisomerization kinetics of  $\ln(A_\infty - A_0)/(A_\infty - A_t)$  as a function of time for La(LA)<sub>3</sub>, Eu(LA)<sub>3</sub>, Gd(LA)<sub>3</sub> and Yb(LA)<sub>3</sub> in PMMA film.



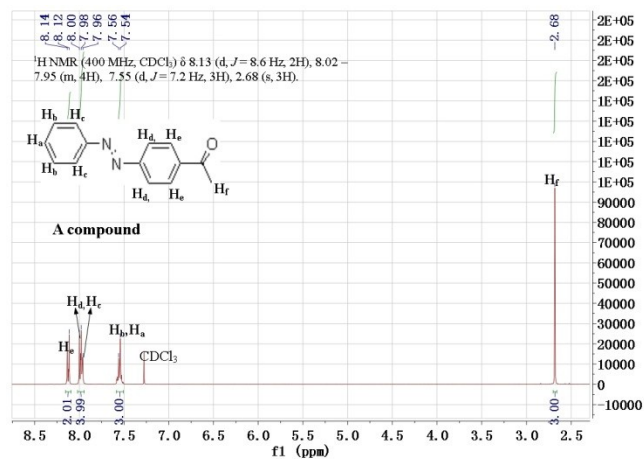

Figure S34. <sup>1</sup>H NMR spectrum of **A** compound in CDCl<sub>3</sub>.

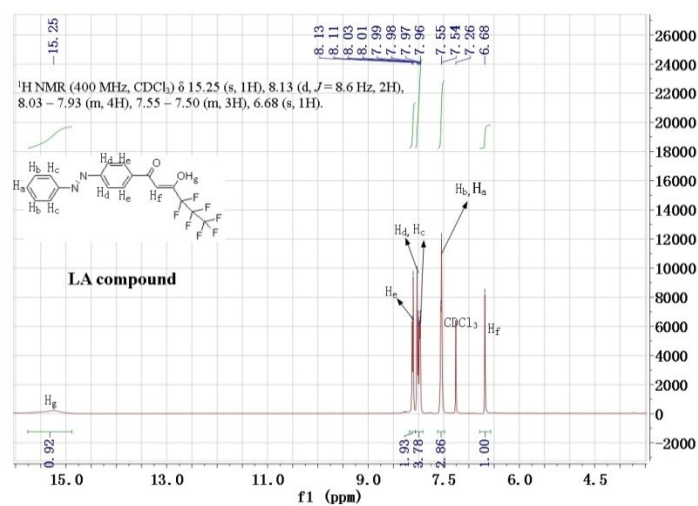

Figure S35. <sup>1</sup>H NMR spectrum of **LA** ligand in CDCl<sub>3</sub>.

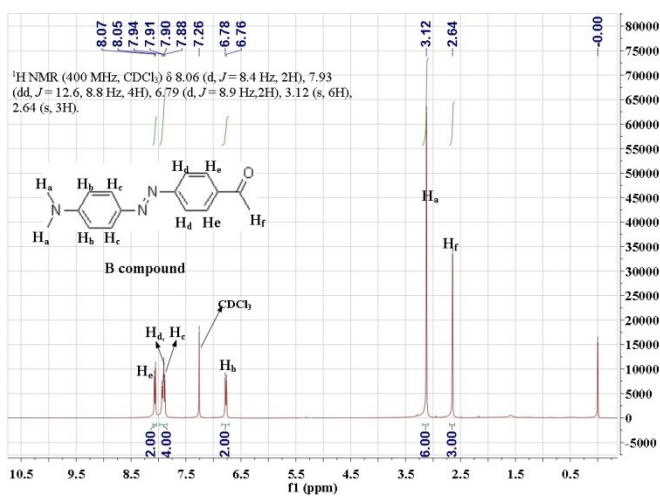

Figure S36. <sup>1</sup>H NMR spectrum of **B** compound in CDCl<sub>3</sub>.

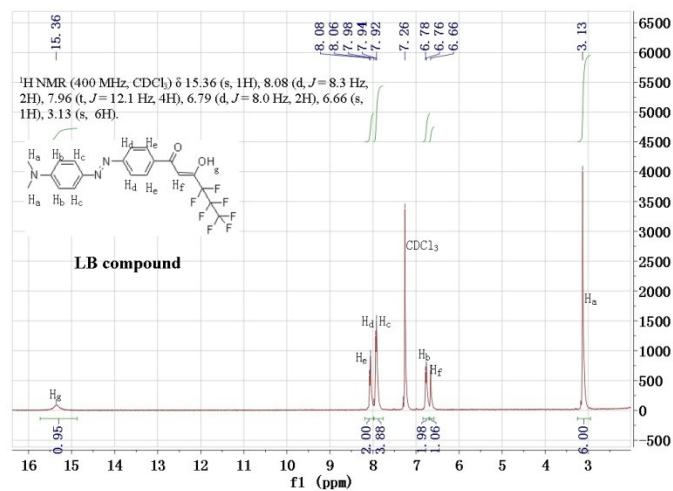

Figure S37. <sup>1</sup>H NMR spectrum of **LB** ligand in CDCl<sub>3</sub>.

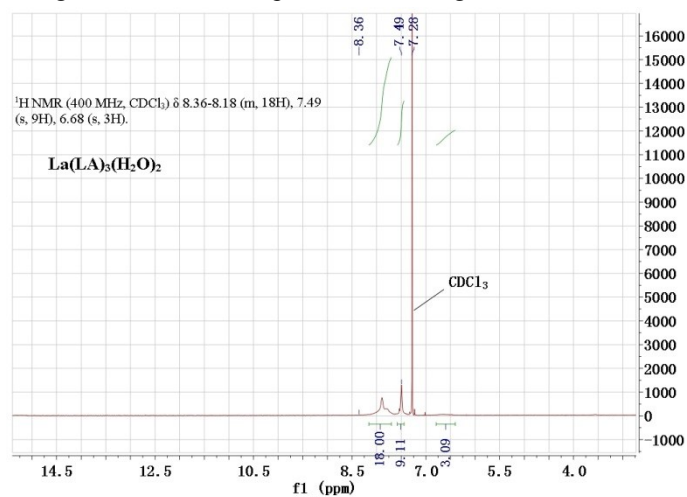

Figure S38. <sup>1</sup>H NMR spectrum of complex **La(LA)<sub>3</sub>** in CDCl<sub>3</sub>.

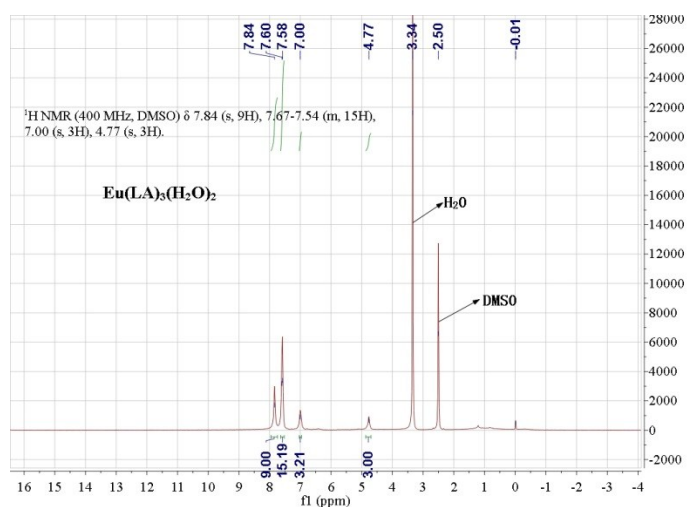

Figure S39. <sup>1</sup>H NMR spectrum of complex **Eu(LA)<sub>3</sub>** in DMSO-*d*<sub>6</sub>.

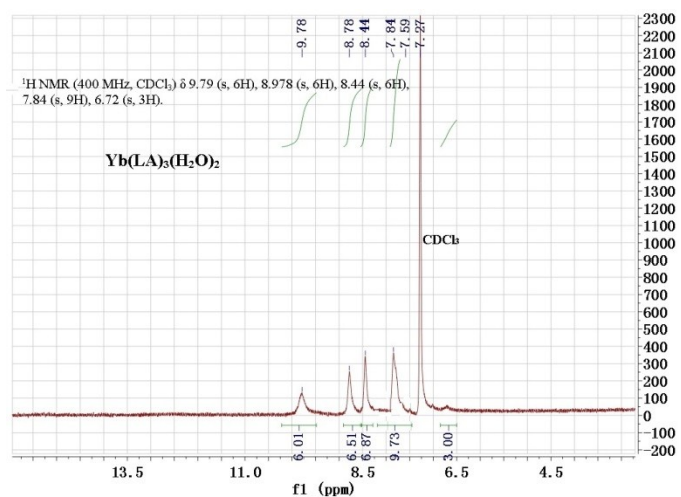

Figure S40.  $^1\text{H NMR}$  spectrum of complex  $\text{Yb(LA)}_3$  in  $\text{CDCl}_3$ .

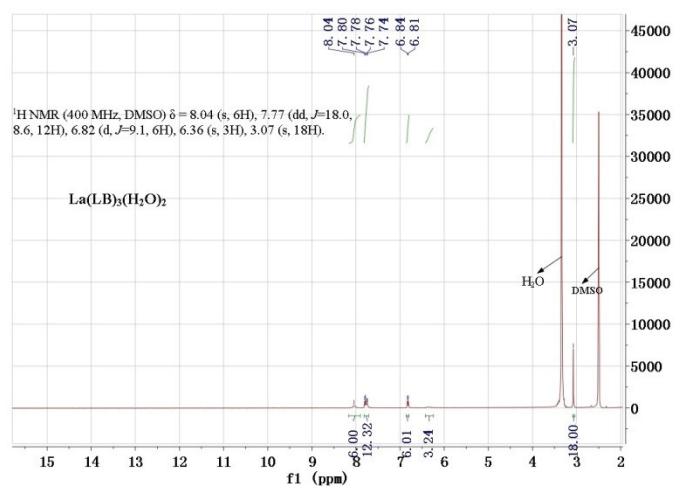

Figure S41.  $^1\text{H NMR}$  spectrum of complex  $\text{La(LB)}_3$  in  $\text{DMSO-}d_6$ .

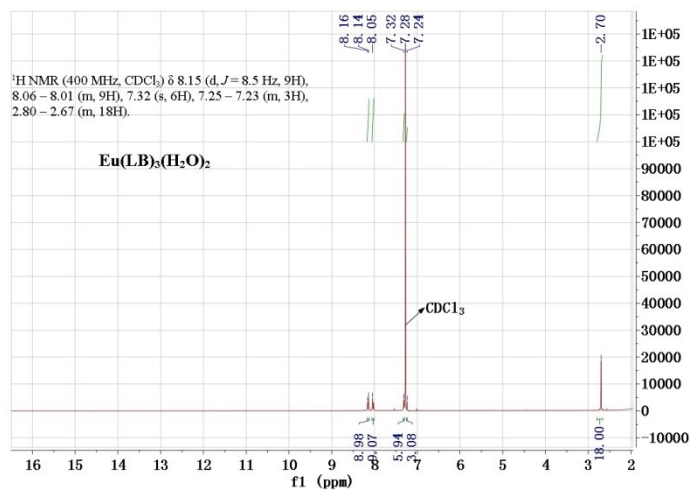

Figure S42. <sup>1</sup>H NMR spectrum of complex Eu(LB)<sub>3</sub> in CDCl<sub>3</sub>.

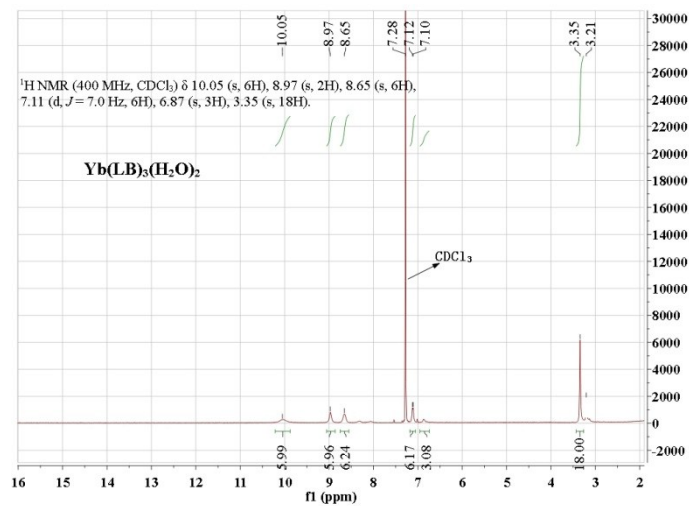

Figure S43. <sup>1</sup>H NMR spectrum of complex Yb(LB)<sub>3</sub> in CDCl<sub>3</sub>.

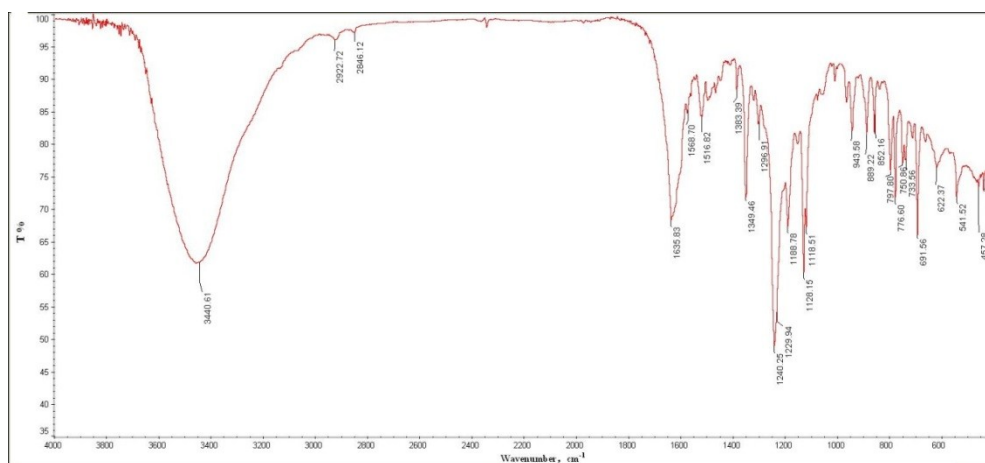

Figure S44. IR spectrum of LA ligand in KBr pellet.

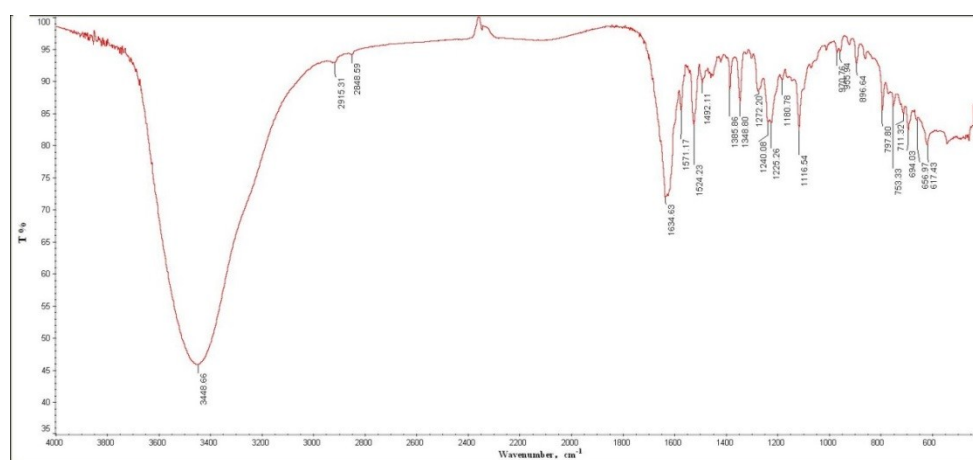

Figure S45 IR spectrum of complex La(LA)<sub>3</sub> in KBr pellet.

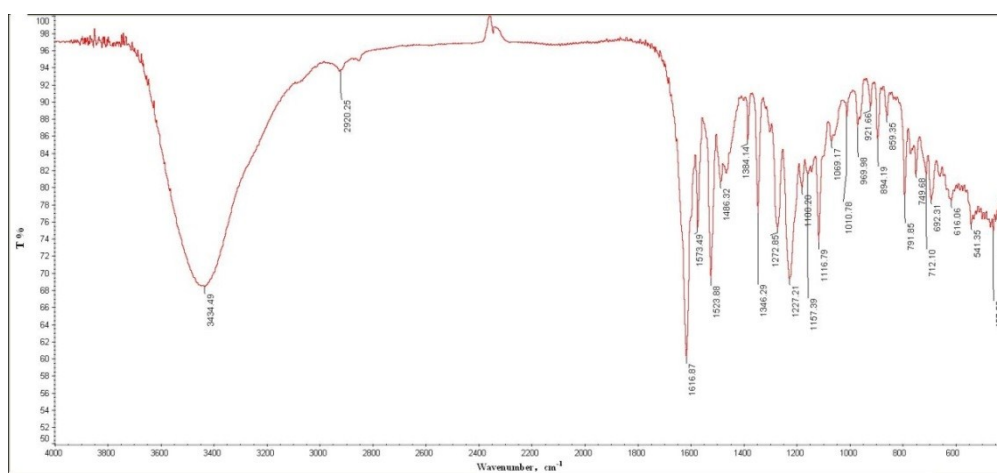

Figure S46. IR spectrum of complex Eu(LA)<sub>3</sub> in KBr pellet.

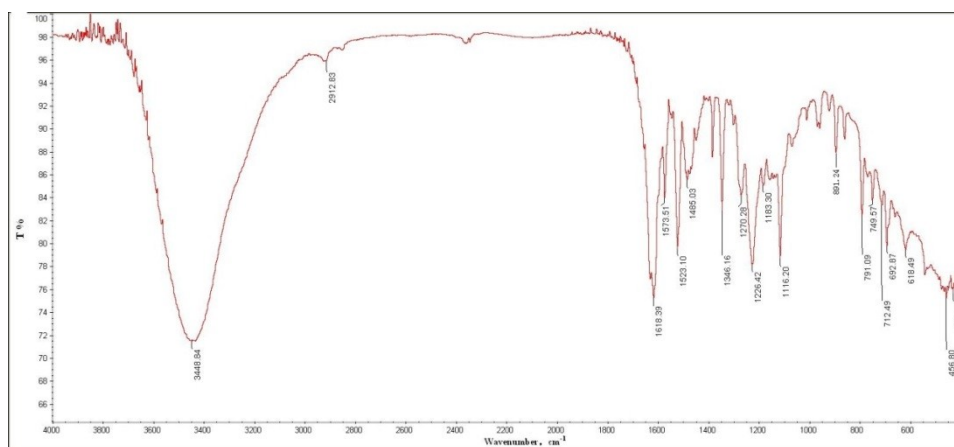

Figure S47. IR spectrum of complex  $Gd(LA)_3$  in KBr pellet.

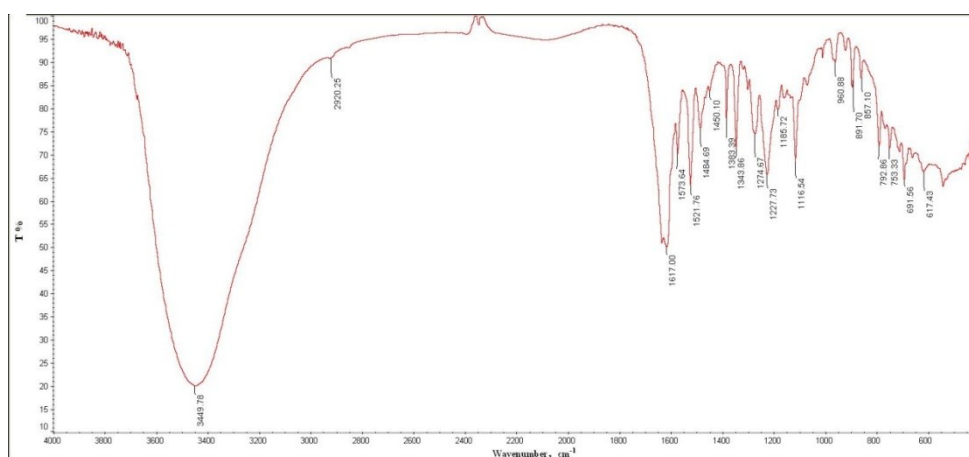

Figure S48. IR spectrum of complex  $Yb(LA)_3$  in KBr pellet.

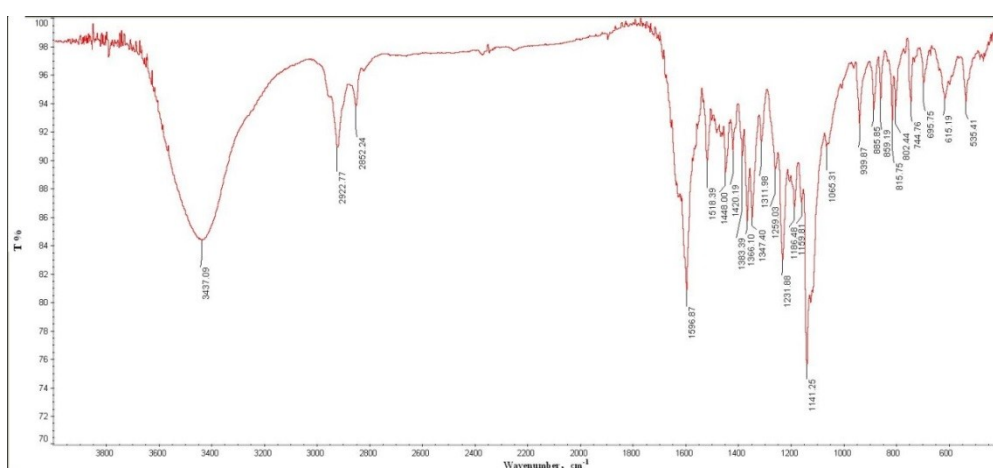

Figure S49. IR spectrum of complex **LB** ligand in KBr pellet.

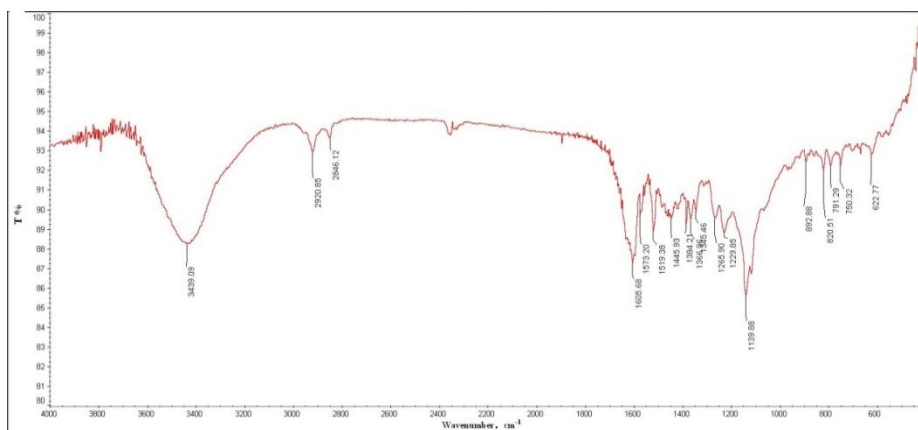

Figure S50. IR spectrum of complex La(LB)<sub>3</sub> in KBr pellet.

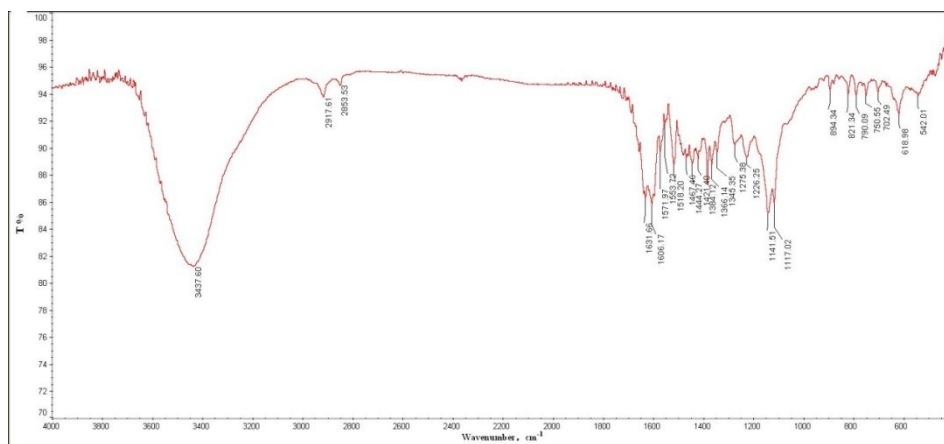

Figure S51. IR spectrum of complex Eu(LB)<sub>3</sub> in KBr pellet.

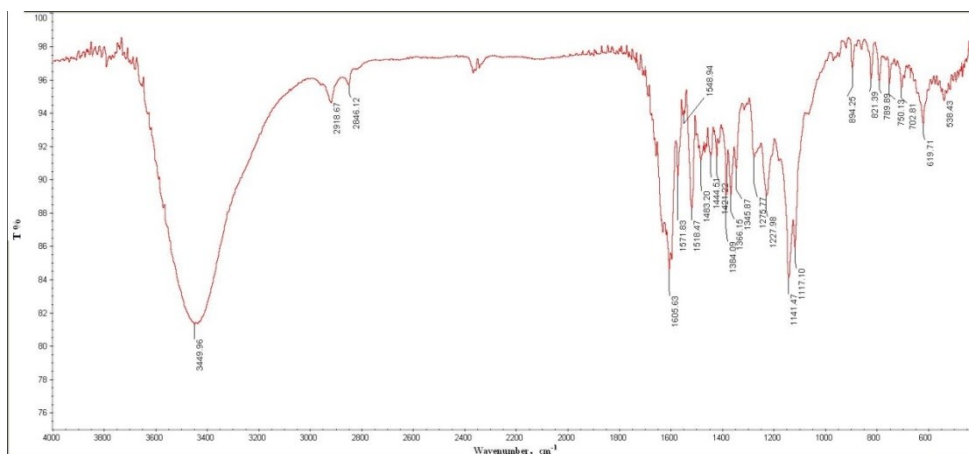

Figure S52. IR spectrum of complex Gd(LB)<sub>3</sub> in KBr pellet.

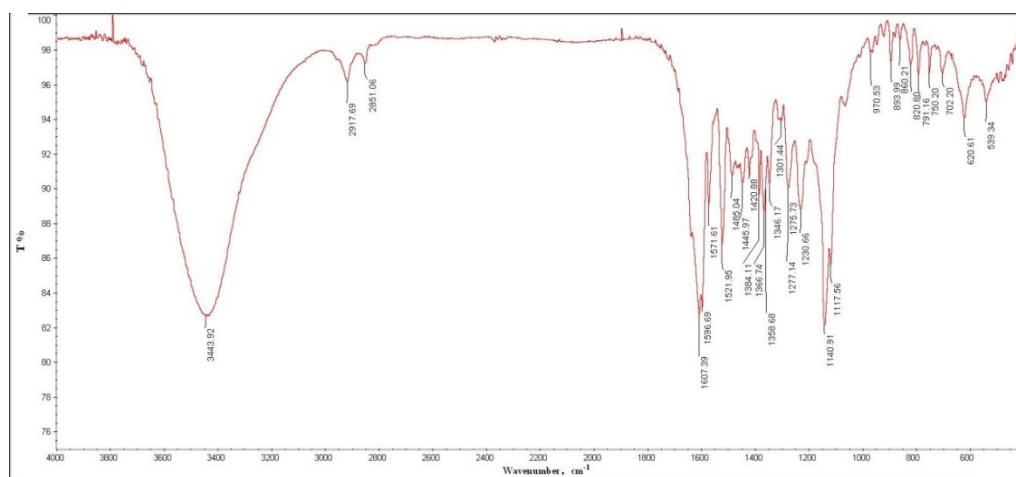

Figure S53. IR spectrum of complex  $\text{Yb}(\text{LB})_3$  in KBr pellet.
